# Supplementary material
Source: publisher figshare collection journal article supplement (https://sage.figshare.com/ndownloader/files/17709833)
Supplement: Supplementary file 1 [file 17709833]

**Journal** of **Health**

and **Social Behavior**

OFFICIAL JOURNAL OF THE AMERICAN SOCIOLOGICAL ASSOCIATION

**ONLINE SUPPLEMENT**

**to article in**

Journal of Health and Social Behavior, 2019, Vol. 60, Issue 3

**Cumulative Effects of Bullying and Racial Discrimination on Adolescent Health in Australia**

**Naomi Priest**

*Australian National University*

*Murdoch Children’s Research Institute*

**Anne Kavenagh**

*University of Melbourne*

**Laia Bécares**

*University of Sussex*

**Tania King**

*University of Melbourne*

**Appendix 1**

*Bullying Victimization Measure*

**Bullying Victimization Wave 5**

*The next questions are about bullying.*

*During the past month (30 days) at school kids:*

1. *hit or kicked me on purpose*
2. *grabbed or shoved me on purpose*
3. *tried to keep others from being my friend*
4. *did not let me join in what they were doing*
5. *said mean things to me or called me names*
6. *sent me a mean text message/email; or posted mean things about me on the Internet (e.g. on Facebook MySpace)*
7. *threatened to hurt me or take my things*

Response options: *Never; Once or twice; About once a week; Several times a week*.

Analytic categories:

One binary variable “bullying victimization” was derived from these seven types of bullying. Responses were dichotomized into never vs once or more.

**Bullying Victimization Wave 6**

*Did [the following thing / any of these things] happen during the past month (30 days)?*

1. *someone hit or kicked me on purpose;*
2. *someone grabbed or shoved me on purpose;*
3. *someone threatened to hurt me;*
4. *someone threatened to take my things;*
5. *someone said mean things to me or called me names;*
6. *someone tried to keep others from being my friend;*
7. *someone did not let me join in what they were doing;*
8. *someone used force to steal something from me;*
9. *someone hurt me or tried to hurt me with a weapon;*
10. *someone stole my things to be mean to me;*
11. *someone forced me to do something I didn’t want to do*

Response options*: Yes No.*

Analytic approach: as for Wave 5 and consistent with the approach adopted in previous work one binary variable named ‘bullying victimization’ was derived from responses to the 11 types of bullying victimization. Analytic categories for this variable were 0: never (none) and 1: once or more (any bullying victimization).

**Appendix 2**

Interactions between Racial Discrimination and Bullying Victimization Within and across Waves for Weight Status (Overweight/Obese Compared to Normal Weight) and Socioemotional Difficulties (High Risk of Clinical Difficulties Compared to Normal), Longitudinal Study of Australian Children Kindergarten Cohort, 2012–2014

|  | **PRR (95% CI)** |
| --- | --- |
| **Effect on weight status Wave 6** |  |
| **Discrim2014 x Discrim2012** |  |
| No Discrim 2014 x Discrim 2012 | 1.14 (.97,1.35) |
| Discrim 2014 x No Discrim 2012 | 1.19 (.97,1.46) |
| Discrim 2014 x Discrim 2012 | 1.13 (.87,1.45) |
| **Bullying2014 x Bullying2012** |  |
| No Bullying 2014 x Bullying 2012 | 1.13 (1.01,1.26) |
| Bullying 2014 x No bullying 2012 | 1.06 (.87,1.29) |
| Bullying 2014 x Bullying 2012 | 1.10 (.97,1.26) |
| **Effect on socioemotional difficulties Wave 6** |  |
| **Discrim2014 x Discrim2012** |  |
| No Discrim 2014 x Discrim 2012 | 1.56 (.72,2.41) |
| Discrim 2014 x No Discrim 2012 | .88 (.04,1.72) |
| Discrim 2014 x Discrim 2012 | 3.78 (2.13,5.42) |
| **Bullying2014 x Bullying2012** |  |
| No Bullying 2014 x Bullying 2012 | 1.65 (1.23,2.07) |
| Bullying 2014 x No bullying 2012 | 1.72 (.93,2.50) |
| Bullying 2014 x Bullying 2012 | 3.11 (2.60,3.62) |
| **Effect on weight status Wave 6** |  |
| **Discrim2014 x Bullying2014** |  |
| No Discrim 2014 x Bullying 2014 | 1.01 (.90,1.13) |
| Discrim 2014 x No bullying 2014 | 1.04 (.79,1.35) |
| Discrim 2014 x Bullying 2014 | 1.24 (1.01,1.51) |
| **Effect on weight status Wave 6** |  |
| **Discrim2012 x Bullying2012** |  |
| No Discrim 2012 x Bullying 2012 | 1.09 (.99,1.21) |
| Discrim 2012 x No bullying 2012 | 1.10 (.78,1.56) |
| Discrim 2012 x Bullying 2012 | 1.21 (1.03,1.42) |
| **Effect on socioemotional difficulties Wave 6** |  |
| **Discrim2014 x Bullying2014** |  |
| No Discrim 2014 x Bullying 2014 | 1.83 (1.35,2.30) |
| Discrim 2014 x No bullying 2014 | 1.10 (–.06,2.26) |
| Discrim 2014 x Bullying 2014 | 3.13 (2.06,4.20) |
| **Effect on socioemotional difficulties W6** |  |
| **Discrim2012 x Bullying2012** |  |
| No Discrim 2012 x, Bullying 2012 | 1.65 (1.30, 2.00) |
| Discrim 2012 x No bullying 2012 | .03 (–1.01, 1.06) |
| Discrim 2012 x Bullying 2012 | 3.69 (2.80, 4.57) |

Note: X = interaction; Discrim = Discrimination; PRR = Prevalence Rate Ratio; CI = Confidence Interval. *Socioemotional difficulties measured using the Strengths and Difficulties Questionnaire (SDQ) categorized as a binary variable using Australian cut point (high risk of clinical difficulties compared to normal)
